# Supplementary figures and images for: Enhanced theranostic efficacy of epirubicin-loaded SPION@MSN through co-delivery of an anti-miR-21-expressing plasmid and ZIF-8 hybridization to target colon adenocarcinoma
Source: Royal Society of Chemistry journal article supplement (doi:10.1039/d3nr06642h), 2024-01-01

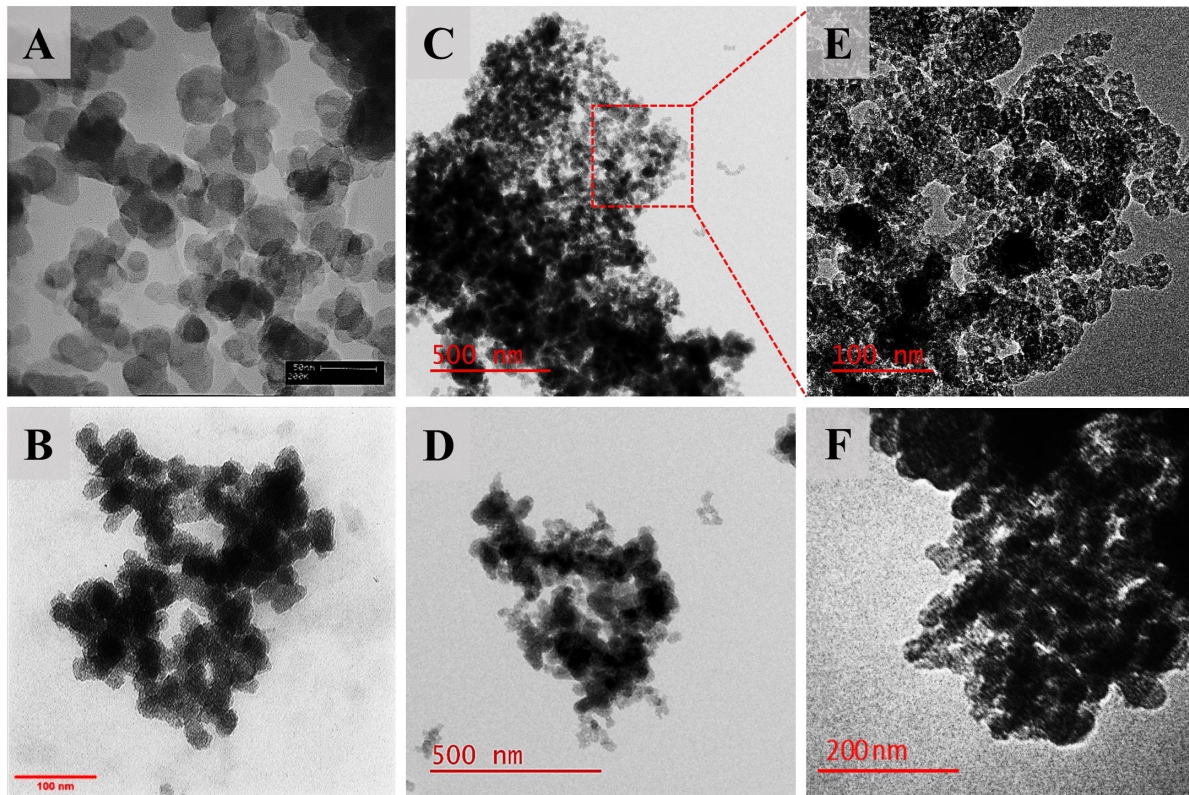

Supplement: d3nr06642h3.pdf [file d3nr06642h3.pdf]

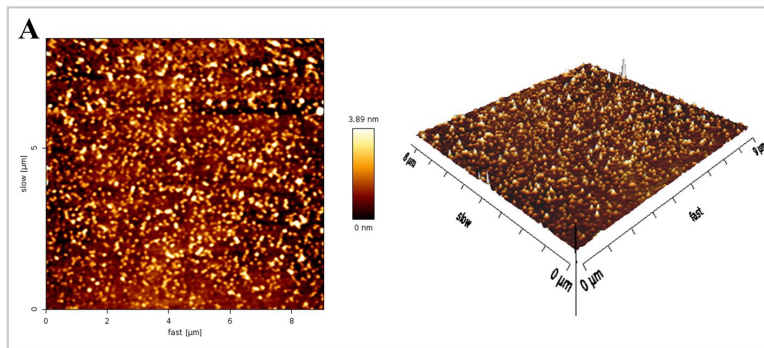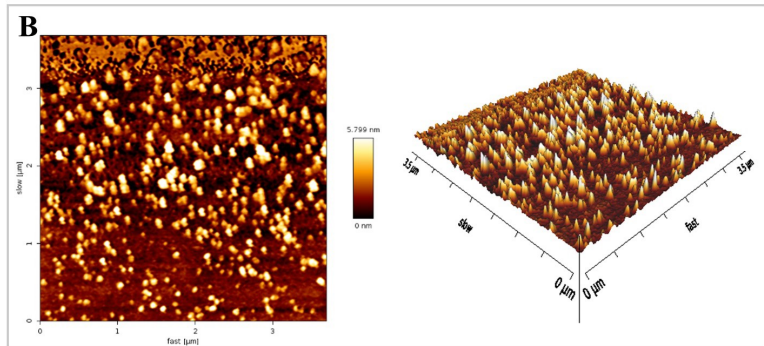

Supplement: d3nr06642h4.pdf [file d3nr06642h4.pdf]

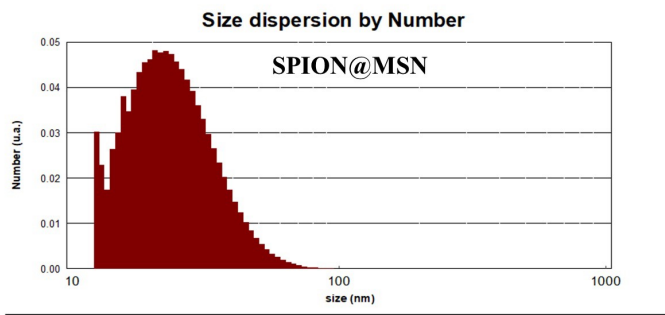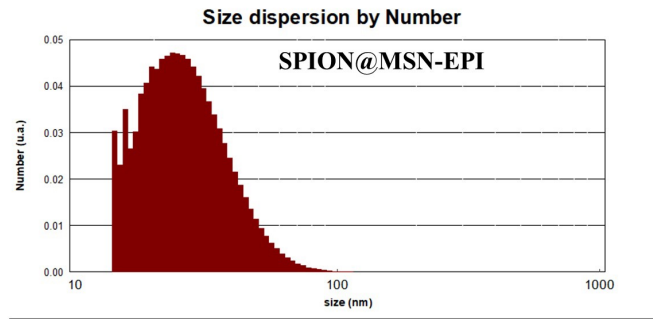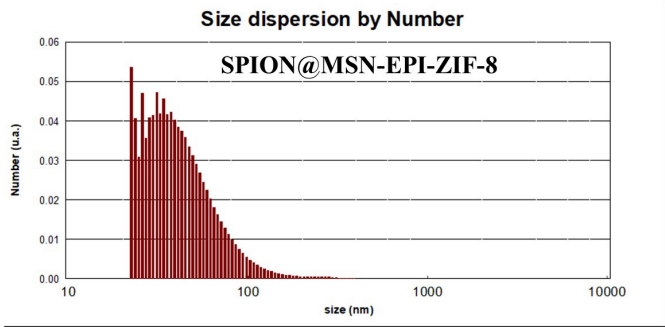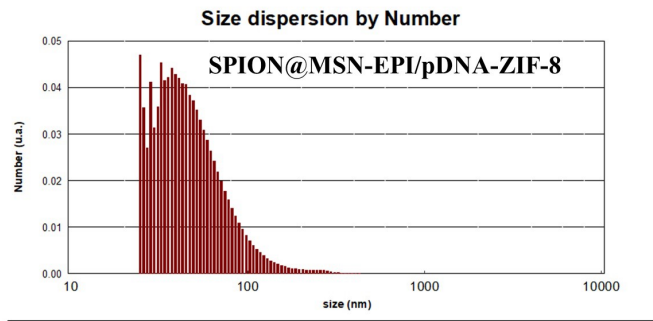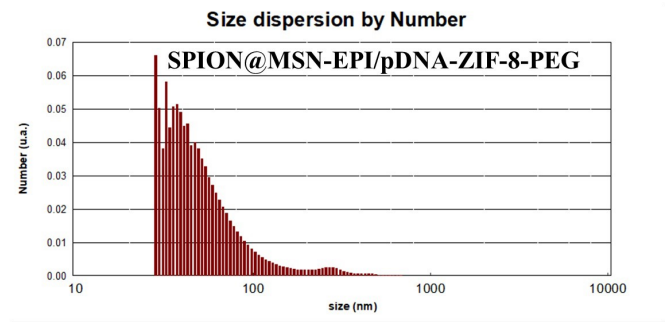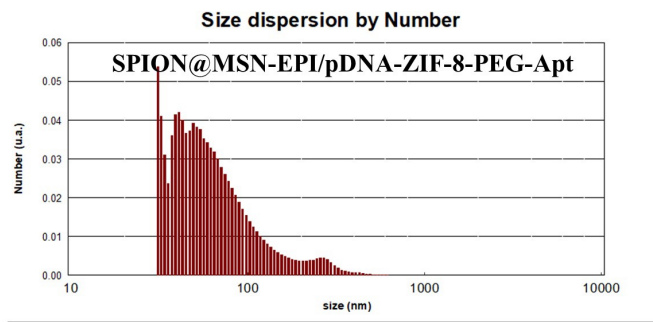

Supplement: d3nr06642h5.pdf [file d3nr06642h5.pdf]

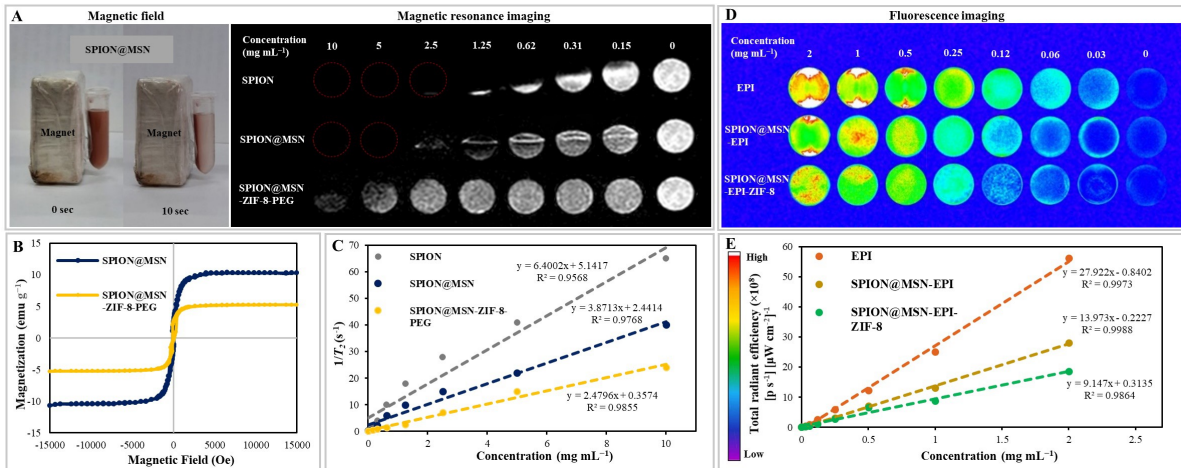

Supplement: d3nr06642h6.pdf [file d3nr06642h6.pdf]

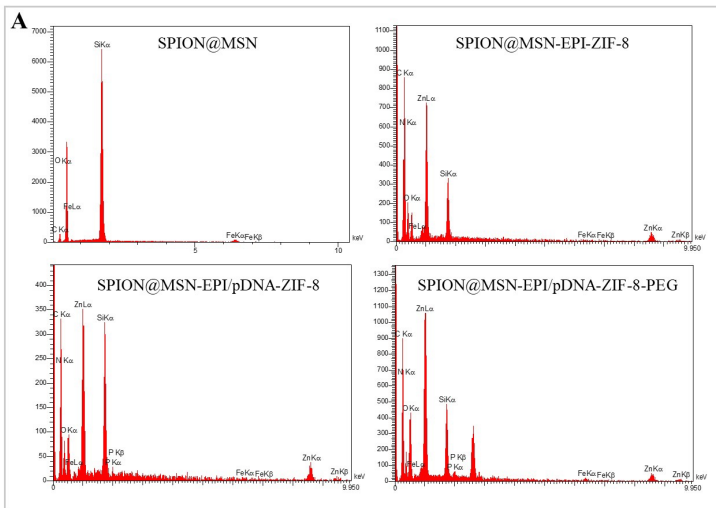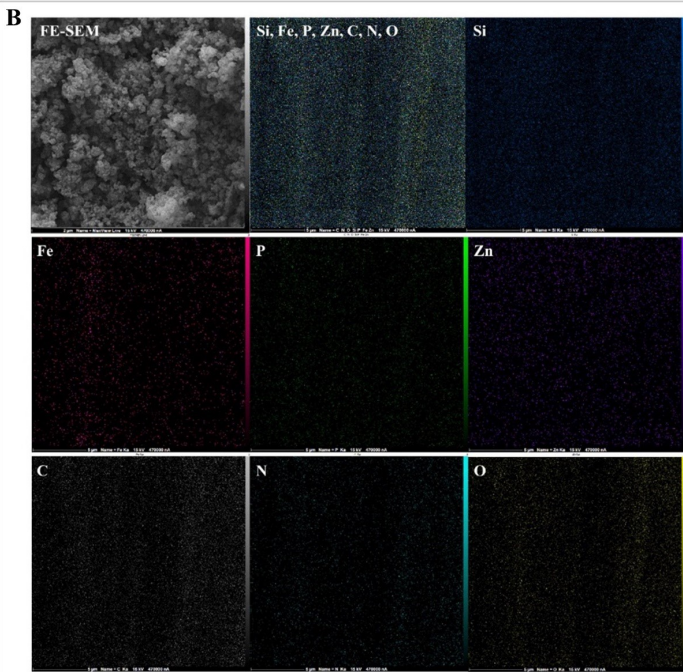

Supplement: d3nr06642h7.pdf [file d3nr06642h7.pdf]

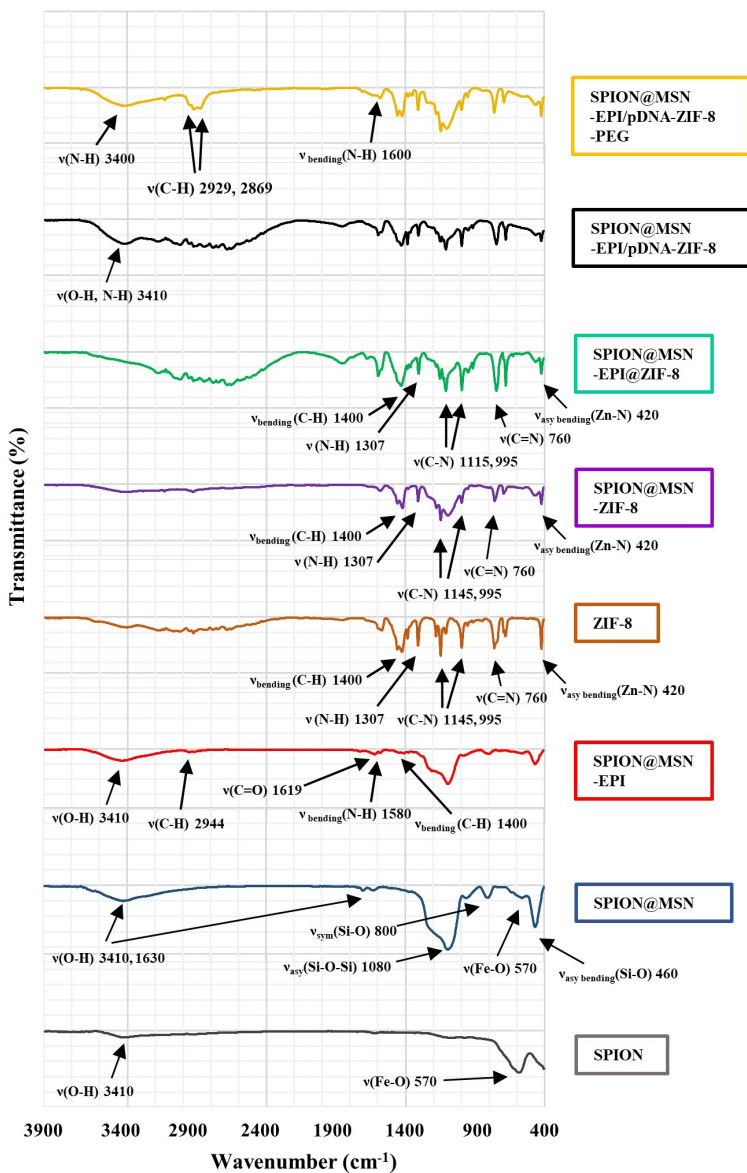

Supplement: d3nr06642h8.pdf [file d3nr06642h8.pdf]

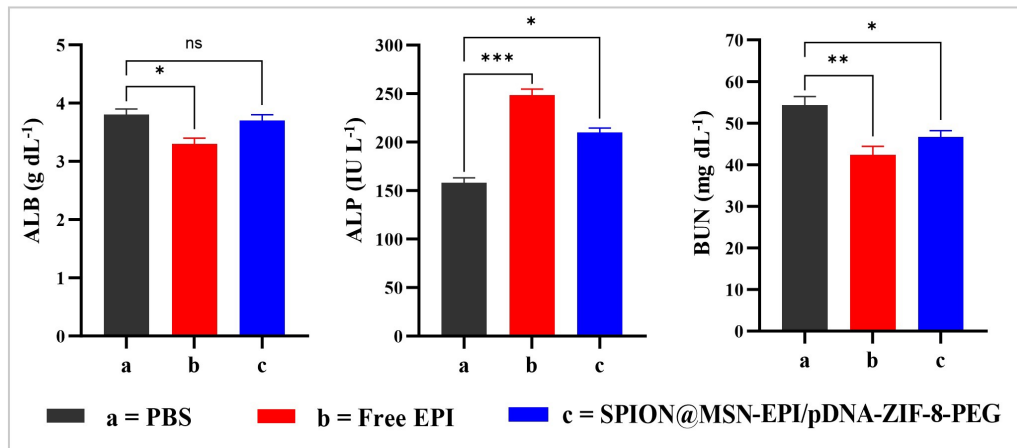

Supplement: d3nr06642h9.pdf [file d3nr06642h9.pdf]
